# Supplementary material
Source: HighWire-hosted journal article supplement (https://genome.cshlp.org/content/suppl/2004/06/17/14.7.1394)
Supplement: mauve_algo_v1.pdf [file mauve_algo_v1.pdf]

# Mauve: Supplementary algorithm description

Aaron C. E. Darling

March 29, 2004

## Appendix A: Description of the Multi-MUM search algorithm

The multi-MUM search algorithm described herein is a seed-and-extend method based on the method that can identify both multi-MUMs occurring in all genomes under study in addition to those occurring only in subsets of the genomes being searched. The multi-MUM search algorithm has time complexity  $O(G^2n + Gn \log Gn)$  where  $G$  is again the number of genomes and  $n$  the length of the longest genome. Further, the random-access memory requirements are proportional to the number of multi-MUMs found, not  $n$ , allowing it to efficiently tackle large data sets.  $O(Gn)$  disk space is used to store sequentially accessed data structures.

The algorithm proceeds by constructing a sorted list of  $k$ -mers for each genome  $g \in G$ . The sorted  $k$ -mer lists are then scanned to identify  $k$ -mers that occur in two or more sequences but that occur at most once in any sequence. If a multi-MUM that subsumes the  $k$ -mer match has not yet been discovered, then the match seeds an extension in each genome until a mismatch occurs. When a mismatch occurs an extension is seeded

in the subset of sequences that are still identical, but only if a subsuming multi-MUM has not yet been discovered.

Given a match seed, a key feature of our algorithm is its ability to efficiently determine whether an existing multi-MUM subsumes the seed. Mauve uses a hash table to track known matches. The hash function  $h(M)$  for a match  $M$  yields a quantity we refer to as the *generalized offset* of a match  $M$ . Using the notation of multi-MUMs introduced in the primary manuscript,  $h(M)$  can be written as  $h(M) = \sum_{j=1}^G |M.S_j - M.S_1|$ . In order to mitigate the effects of potential hash collisions, each bucket of the hash table uses a binary search tree to store matches.

For the purposes of time complexity analysis, the matching algorithm can be deconstructed into four primary components: Sorted Mer List (SML) construction, seed match identification, seed lookup in the known match hash table, and seed extension. SML construction can be accomplished in  $O(Gn)$  (linear) time using radix sort methods. Identifying seed matches from the Sorted Mer Lists requires a single sequential scan through each SML and is thus also  $O(Gn)$ .

The seed lookup phase can be executed at most once for every multi-MUM seed. Because there are  $Gn$  mers, the largest possible number of unique mer-matches is  $\frac{Gn}{2}$ . If all of these mer-matches were to hash to the same bucket then a tree search and insertion would be required for every seed match. Using a splay tree (Sleator and Tarjan, 1985), the amortized time complexity for  $Gn$  tree lookups and insertions is  $O(Gn \log Gn)$ .

The amount of match extension depends on the number and size of multi-MUMs identified. Because we are identifying MUMs, each nucleotide can be a part of at most 2 MUMs on the forward strand and 2 MUMs on the reverse strand, for a total of 4 MUMs. Furthermore, it holds that any

nucleotide can be a part of at most 4 multi-MUMs with a given *multiplicity*. Thus each nucleotide can be a part of  $4G$  multi-MUMs, or just  $O(G)$  multi-MUMs. For a given multiplicity  $m$ , the largest possible amount of extension work depends on the maximum possible number of matching mers at that multiplicity:  $\frac{Gn}{m}$ . Further, each extension at a particular multiplicity  $m$  requires  $m$  character comparisons. Thus the maximum number of character comparisons for a given multiplicity is  $m \frac{Gn}{m}$  or just  $Gn$ , and since there are  $G$  multiplicity levels, the maximum number of comparisons to find all multi-MUMs is  $G^2n$ .

By adding the contributions each of the algorithm's four components make toward the total running time, we arrive at  $Gn + Gn + Gn \log Gn + G^2n$ . In asymptotic notation, the  $Gn$  terms are subsumed by  $G^2n$ , leaving  $O(G^2n + Gn \log Gn)$ . It is important to note that although suffix tree algorithms provide better asymptotic time complexity than our seed-and-extend method, in practice our implementation is very fast and space efficient. Furthermore, the seed matching technique can be easily modified to use weighted/spaced seeds, allowing inexact string matching not possible with suffix tree-like data structures in the same low asymptotic time complexity.

## Appendix B: Partitioning M into collinear subsets

As part of the anchor selection process, Mauve must partition the initial set of multi-MUMs into collinear subsets. To do so, Mauve implements a breakpoint analysis algorithm based on the description of breakpoints given by Blanchette et al. (1997). We refer to the resulting collinear sets of multi-MUMs as LCBs. An LCB can be defined formally as a maximal collinear

subset of the matches in  $\mathbf{M}$ , or  $lcb \subseteq \mathbf{M}$  where  $M_i$  is the  $i^{th}$  multi-MUM in the LCB. The MUMs that constitute an LCB must satisfy a total ordering property such that  $M_i.S_j \leq M_{i+1}.S_j$  holds for all  $i$ ,  $1 \leq i \leq |lcb|$  and all  $j$ ,  $1 \leq j \leq G$ .

Mauve uses a standard breakpoint determination algorithm to partition the set of multi-MUMs into a set of LCBs. First, Mauve orders the multi-MUMs in  $\mathbf{M}$  on  $|M_i.S_0|$ . Next, a monotonically increasing label between 1 and  $|\mathbf{M}|$  is assigned to each MUM corresponding to the index of the MUM in the ordering on  $|M_i.S_0|$ . We will refer to the label of the  $i^{th}$  multi-MUM as  $M_i.label$ . Note that  $M_i.label \in \mathbb{N}$ . Next, the set of multi-MUMs is repeatedly reordered based on  $|M_i.S_j|$  for  $j = 2 \dots G$ . After each reordering, the set of multi-MUMs are examined for breakpoints. A breakpoint exists between  $M_i$  and  $M_{i+1}$  if  $M_i.label + 1 \neq M_{i+1}.label$  and both  $M_i$  and  $M_{i+1}$  are in the forward orientation, or if  $M_i.label - 1 \neq M_{i+1}.label$  and both  $M_i$  and  $M_{i+1}$  are in the reverse complement orientation. A breakpoint also exists if  $M_i$  is in a different orientation than  $M_{i+1}$  in sequence  $j$ , e.g. the sign of  $M_i.S_j$  is different than the sign of  $M_{i+1}.S_j$ .

Finally, the multi-MUMs are re-ordered on  $M.label$  and the LCBs are then any maximal length subsequence of multi-MUMs  $M_i \dots M_{i+j}$  that does not contain any recorded breakpoints between multi-MUMs.

## References

- Blanchette, M., Bourque, G., and Sankoff, D. (1997). Breakpoint Phylogenies. *Genome Inform Ser Workshop Genome Inform*, 8:25–34.
- Sleator, D. D. and Tarjan, R. E. (1985). Self-adjusting binary search trees. *J. ACM*, 32(3):652–686.
